# Supplementary material
Source: publisher figshare collection journal article supplement (https://acs.figshare.com/ndownloader/files/5750496)
Supplement: Supplementary file 1 [file 5750496]

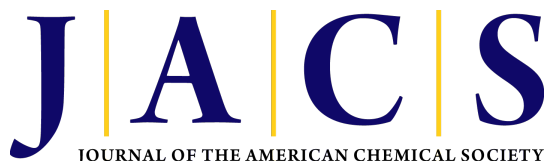

J | A | C | S  
JOURNAL OF THE AMERICAN CHEMICAL SOCIETY

J. Am. Chem. Soc., 1996, 118(30), 7055-7062, DOI:[10.1021/ja960948m](https://doi.org/10.1021/ja960948m)

#### Terms & Conditions

Electronic Supporting Information files are available without a subscription to ACS Web Editions. The American Chemical Society holds a copyright ownership interest in any copyrightable Supporting Information. Files available from the ACS website may be downloaded for personal use only. Users are not otherwise permitted to reproduce, republish, redistribute, or sell any Supporting Information from the ACS website, either in whole or in part, in either machine-readable form or any other form without permission from the American Chemical Society. For permission to reproduce, republish and redistribute this material, requesters must process their own requests via the RightsLink permission system. Information about how to use the RightsLink permission system can be found at <http://pubs.acs.org/page/copyright/permissions.html>

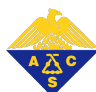

ACS Publications

MOST TRUSTED. MOST CITED. MOST READ.

Copyright © 1996 American Chemical Society

## Figure Legends

Figure S1. (a) Structure and U.V.-Vis spectrum of the DNA-Hoechst conjugate (**13**) formed by the reaction of **5** with the dodecamer: 5' d(CpGpCpAp(NHCH<sub>2</sub>CH<sub>2</sub>SH)ApApApApApGpCpG) tethering an unmasked thiol.

Figure S2. HPLC analysis of the conjugate of the conjugate **12a** (see Scheme 3) after digestion with snake venom phosphodiesterase, nuclease P1 and calf intestinal alkaline phosphatase. Retention times: dC, 6.4 min; dG, 10.4 min; dT, 11.1 min; and d[Tp(NHCH<sub>2</sub>CH<sub>2</sub>S-R)T] (where R is the acetamido moiety resulting from **5**), 62.0 min.

Figure S3. Absorbance vs. Temperature Plot for the duplex formed from conjugate **13a** and the complementary strand. Both the Absorbance vs. Temperature plot, and the 1st derivative plot are illustrated.

Figure S4. HPLC analyses of dodecameric sequences tethering (a) the triphenylacetamide derivative of cystamine (**10**), (b) the unmasked thiol (**11**), (c) a Hoechst 33258 derivative (**12**) - see Scheme 3 in body of manuscript. A peak with the same retention time as that in (c) was also present when the detector was set at 345 nm and a sample of **12** analyzed under the same HPLC conditions.

HPLC conditions: 50 mM triethylammonium acetate pH 7.0 with a linear gradient of acetonitrile (7 - 28% over 30 min). Retention times for the various dodecameric conjugates did not vary significantly with sequence or with the Hoechst derivative.

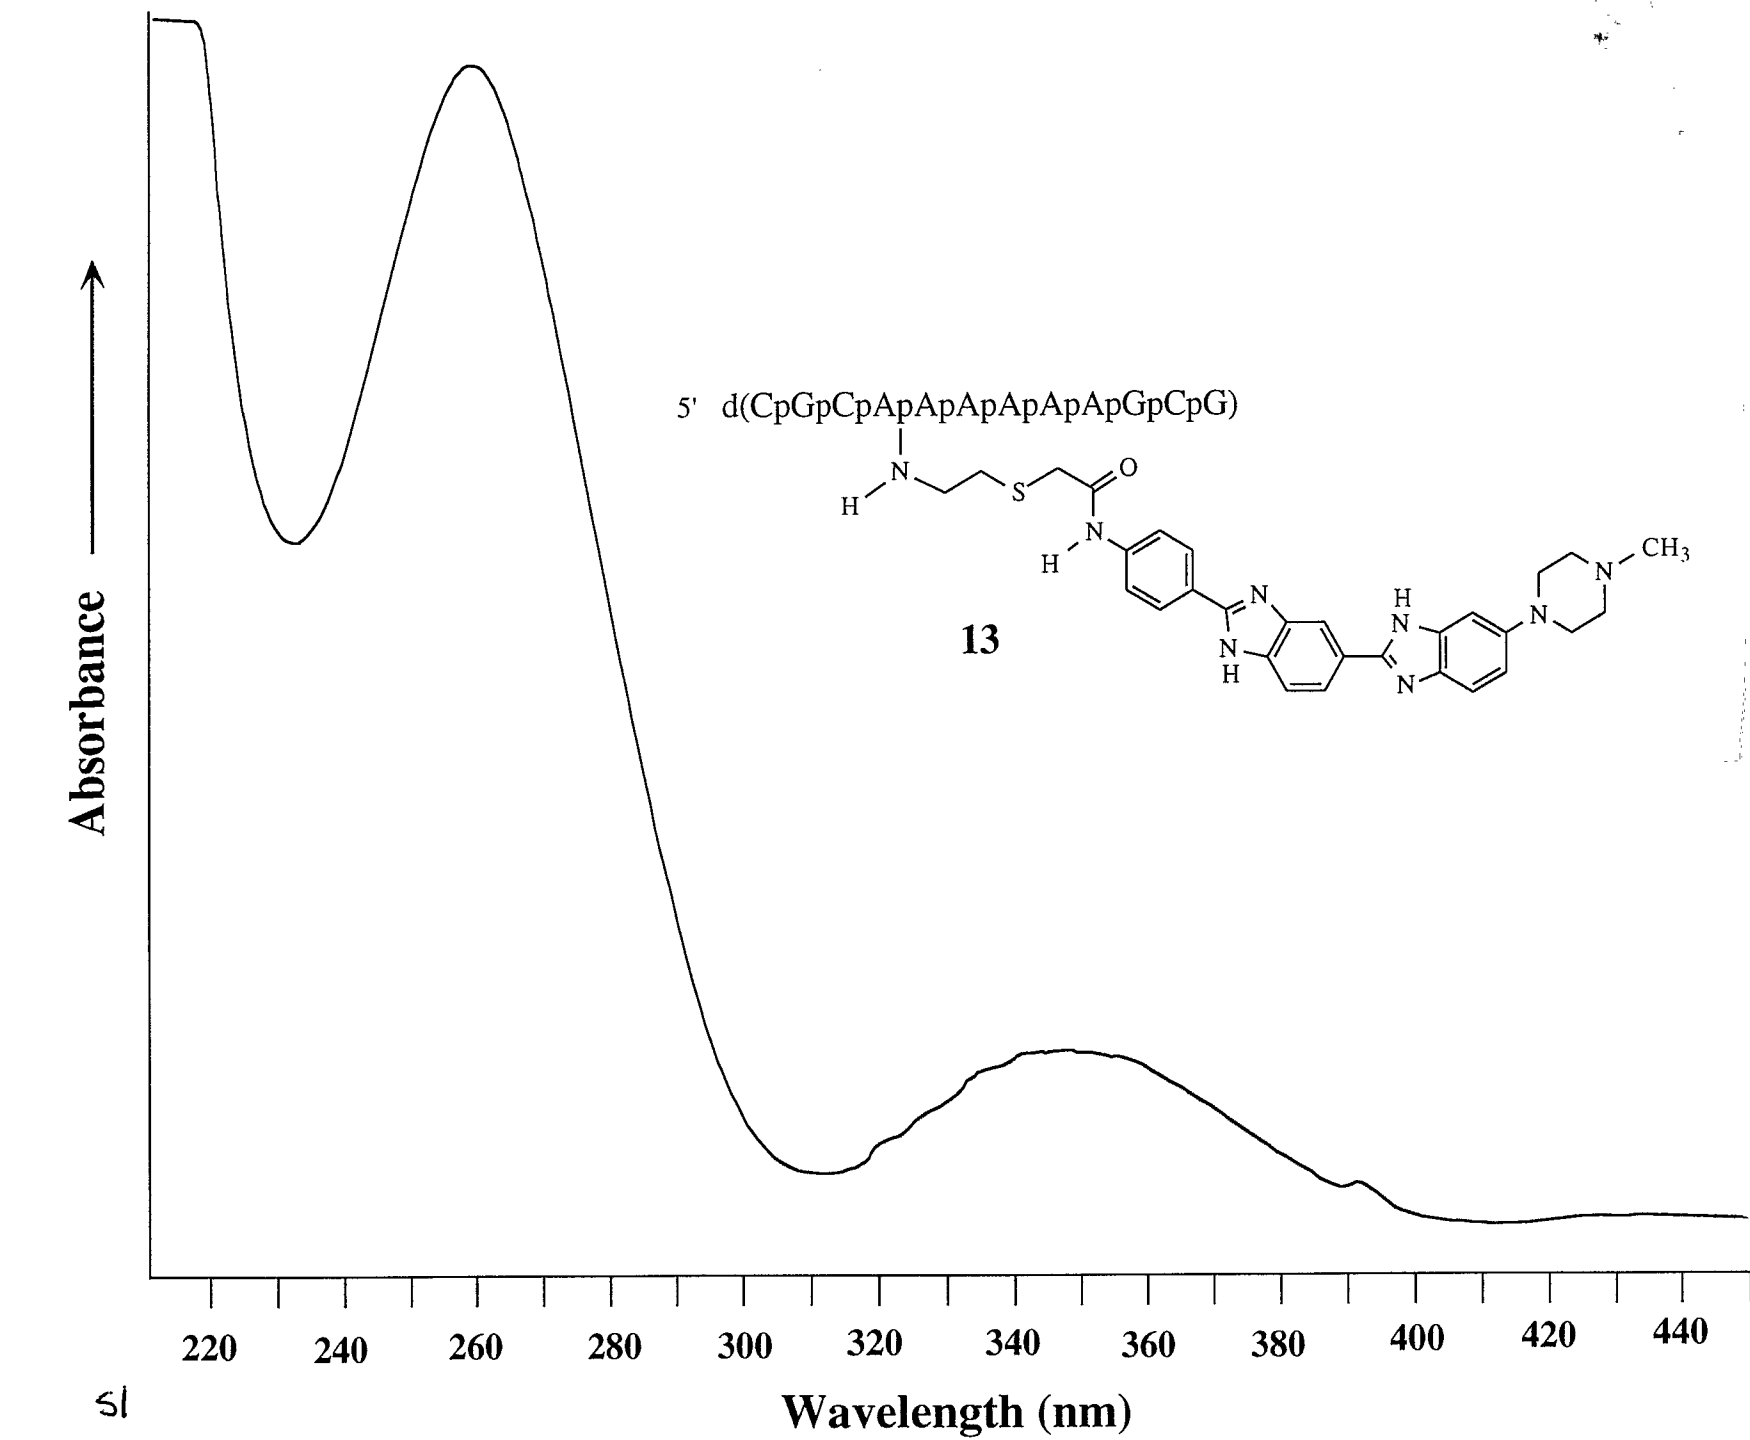

Figure 1

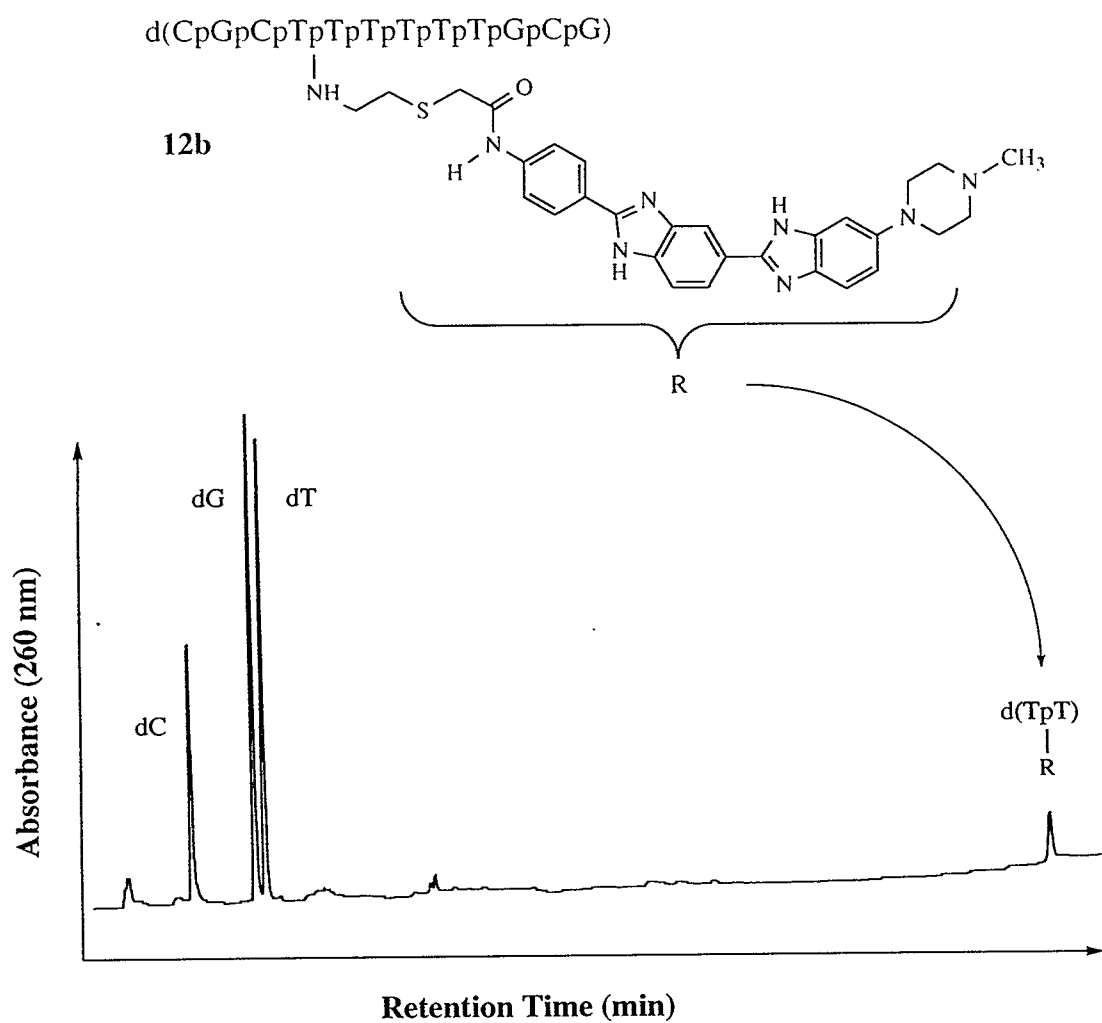

Figure S2

Absorbance (260 nm)

5' d(CpGpCpApApApApApApGpCpG)

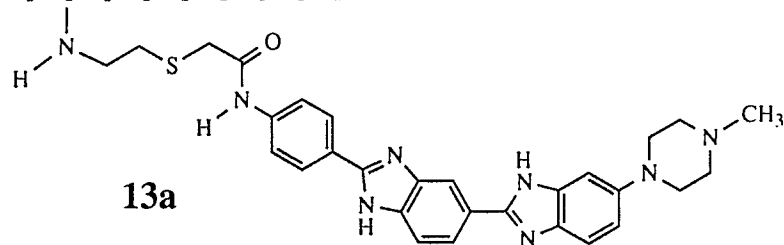

0.27

0.26

0.25

0.24

Absorbance vs. Temperature →

1st Derivative Plot ↗

0

20

40

60

80

Temperature (°C)

Figure S3

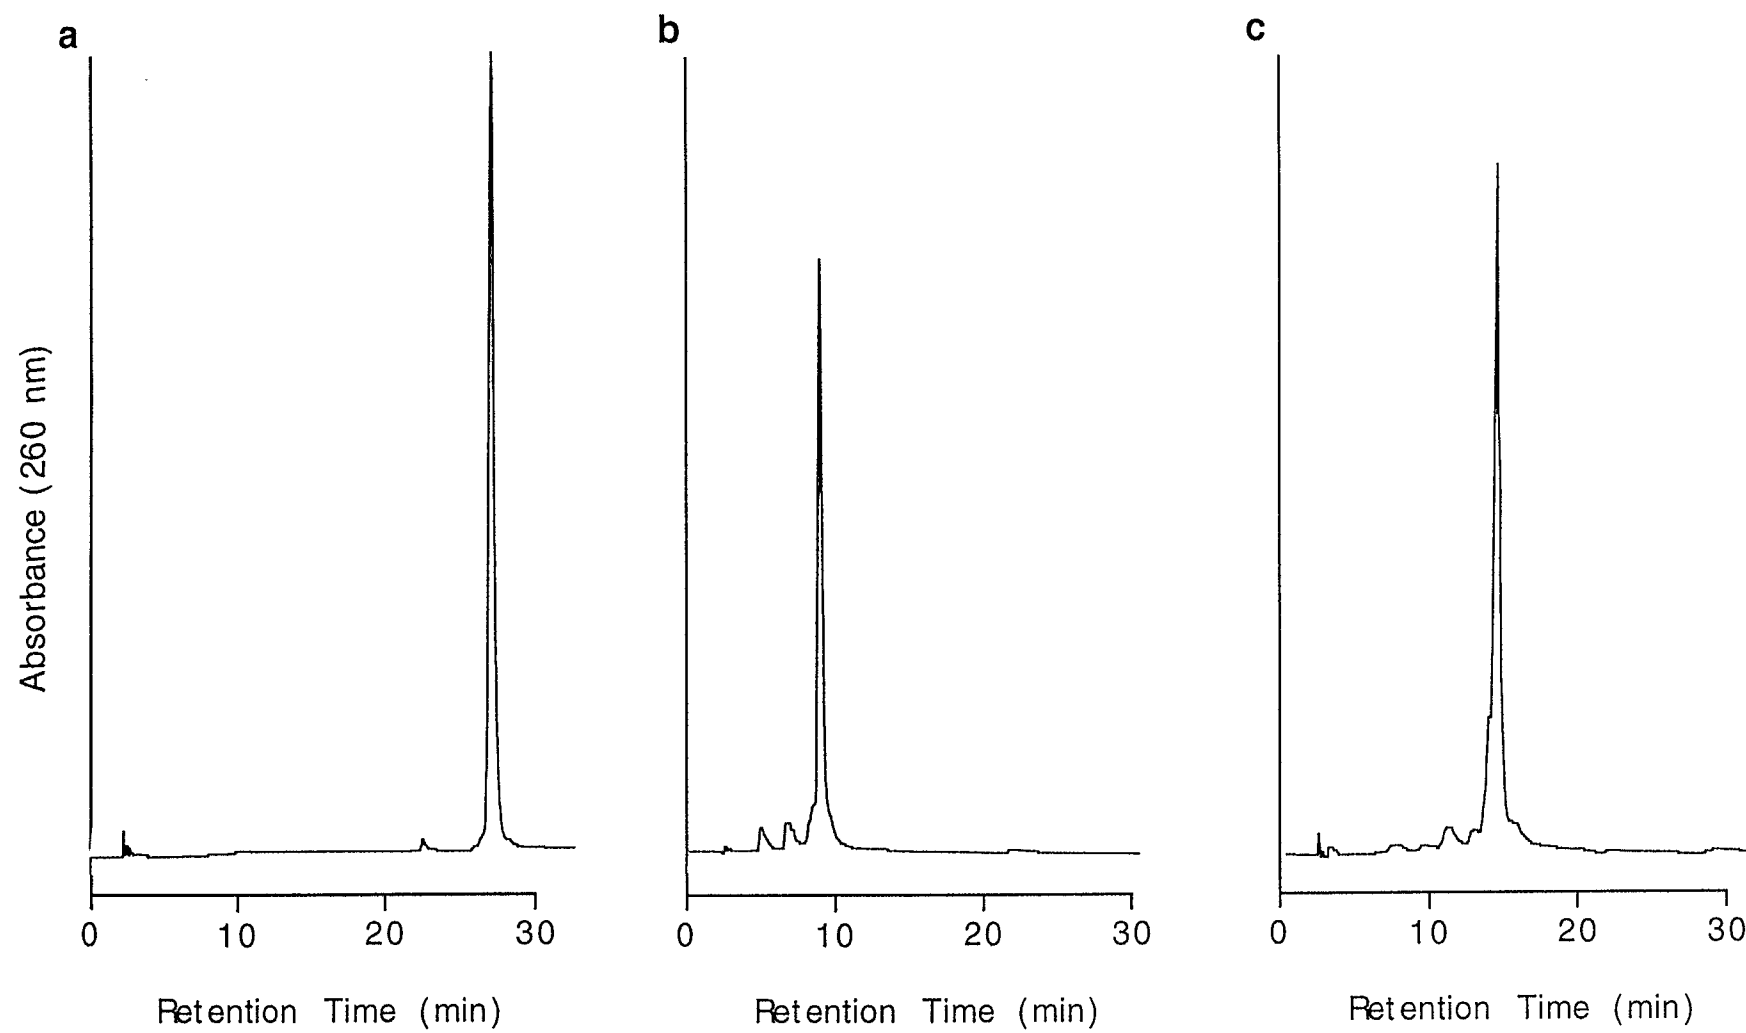

Figure S4
